# Supplementary material for: Strengthening oxygen reduction activity based on the cooperation of pyridinic-N and graphitic-N for atomically dispersed Fe sites
Source: Royal Society of Chemistry journal article supplement (doi:10.1039/d3ta00899a), 2023-01-01
Supplement: d3ta00899a1.pdf [file d3ta00899a1.pdf]

## Supporting Information

### Strengthening Oxygen Reduction Activity on the Cooperation of Pyridinic-N and Graphitic-N for Atomically Dispersed Fe Sites

Gengyu Xing, Guangying Zhang, Baoluo Wang, Miaomiao Tong, Chungui Tian, Lei Wang,\*  
Honggang Fu\*

Key Laboratory of Functional Inorganic Material Chemistry Ministry of Education of the  
People's Republic of China, Heilongjiang University, Harbin 150080, China.

E-mail: wanglei0525@hlju.edu.cn; fuhg@vip.sina.com; fuhg@hlju.edu.cn

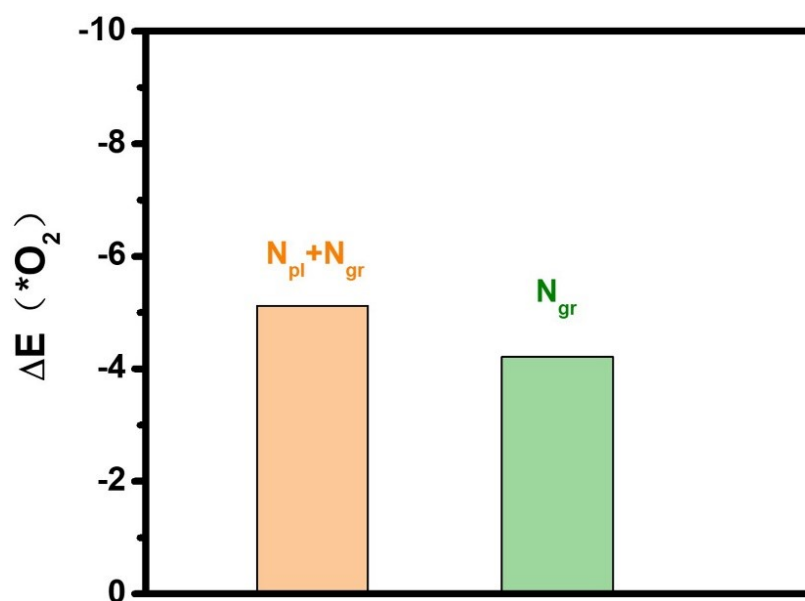

**Fig. S1** Calculated O<sub>2</sub> adsorption energy for the N<sub>pl</sub>+N<sub>gr</sub> and N<sub>gr</sub> models.

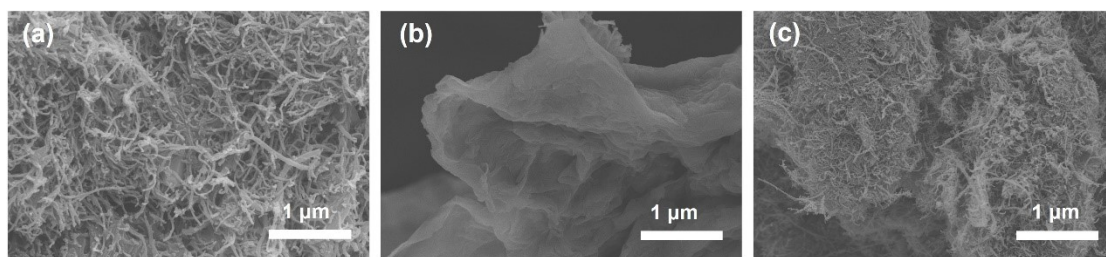

**Fig. S2** SEM images of (a) Fe-N-C/CNT, (b) Fe-N-C/rGO, and (c) Fe-N-C/GC without freeze-drying.

**Table S1.** Mass contents of Fe in Fe–N–C/GC, Fe–FA–C/GC and Fe–Urea–C/GC sample tested by ICP-OES.

| Samples          | Mass content of Fe (wt.%) |
|------------------|---------------------------|
| <b>Fe–N–C/GC</b> | <b>1.74</b>               |
| Fe–FA–C/GC       | 0.83                      |
| Fe–Urea–C/GC     | 0.51                      |

**Table S2.** BET specific surface area values for all the compared samples.

| Catalyst         | BET surface area (m <sup>2</sup> g <sup>−1</sup> ) |
|------------------|----------------------------------------------------|
| <b>Fe–N–C/GC</b> | <b>454.2</b>                                       |
| Fe–FA–C/GC       | 349.7                                              |
| Fe–Urea–C/GC     | 171.2                                              |

**Table S3.** The contents of C, N, O and Fe for the prepared catalysts obtained from XPS spectra in Figure 3d.

|                  | Atom Concents (%) |             |              |             | Mass Contents (%) |             |       |          |
|------------------|-------------------|-------------|--------------|-------------|-------------------|-------------|-------|----------|
|                  | C                 | N           | O            | Fe          | C                 | N           | O     | Fe       |
| <b>Fe–N–C/GC</b> | <b>83.72</b>      | <b>5.28</b> | <b>10.52</b> | <b>0.47</b> | <b>76.19</b>      | <b>5.60</b> | 18.21 | <b>0</b> |
| Fe–FA–C/GC       | 91.41             | 1.34        | 7.25         | 0           | 89.07             | 1.52        | 9.41  | 0        |
| Fe–Urea–C/GC     | 90.17             | 2.82        | 6.47         | 0.54        | 86.23             | 3.15        | 10.62 | 0        |

**Table S4.** The content of different N types for the prepared catalysts calculated from N 1s XPS in Figure 3f.

| Sample         | Pyridinic-N (%) | Pyrrolic-N (%) | Graphitic-N (%) |
|----------------|-----------------|----------------|-----------------|
| <b>Fe-N-GC</b> | <b>59.82</b>    | <b>11.11</b>   | <b>29.07</b>    |
| Fe-FA-C/GC     | 50.60           | 33.91          | 15.49           |
| Fe-Urea-C/GC   | 40.92           | 35.67          | 23.41           |

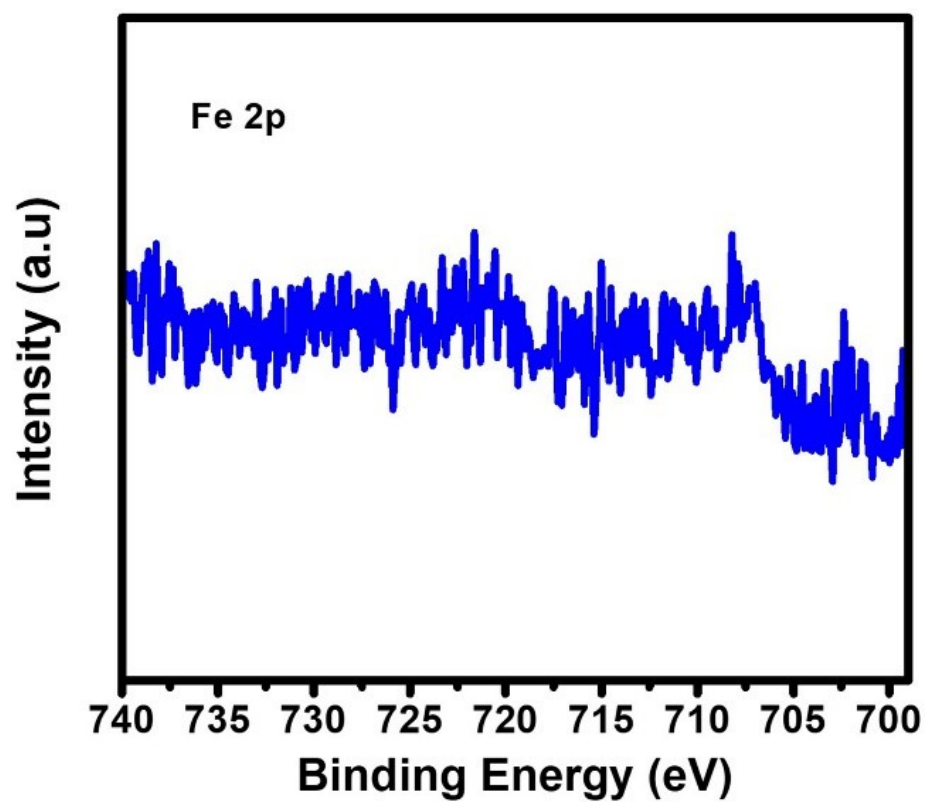

**Fig. S3** High-resolution Fe 2p XPS spectrum of Fe-N-C/GC.

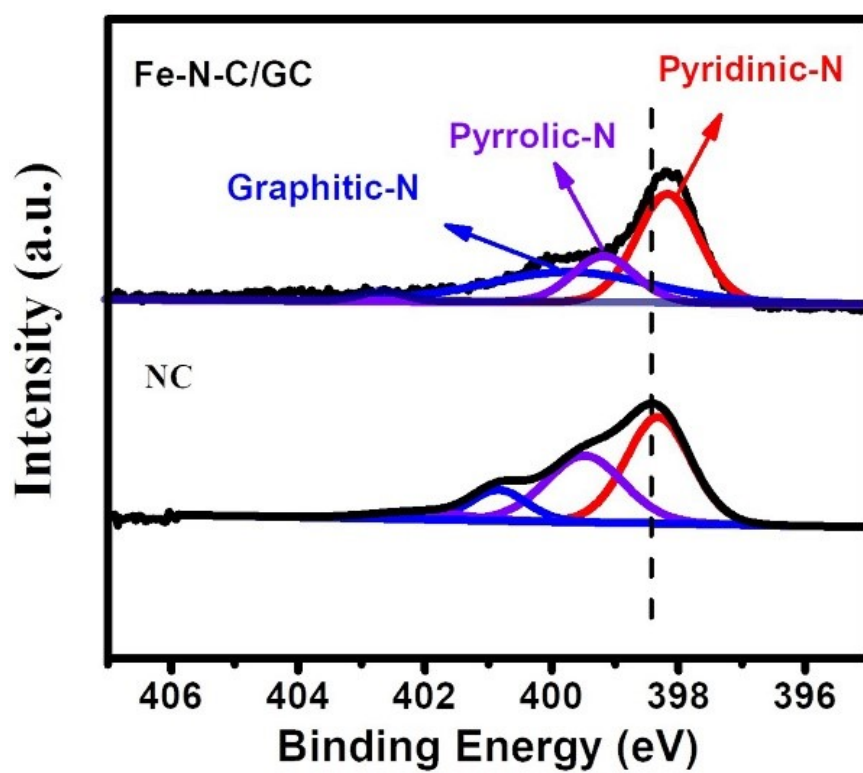

**Fig. S4** High-resolution N 1s XPS spectra of Fe-N-C/GC and NC.

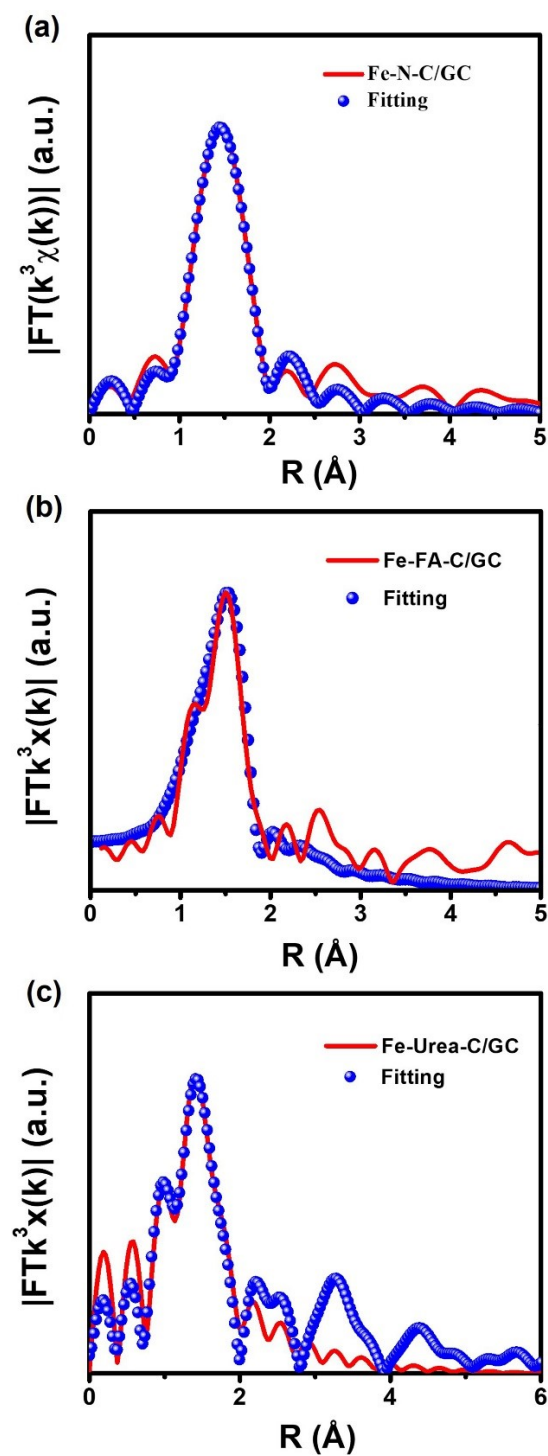

**Fig. S5** FT-EXAFS fitting spectra of Fe K-edge for (a) Fe-N-C/GC, (b) Fe-FA-C/GC and (c) Fe-Urea-C/GC.

**Table S5.** FT-EXAFS fitting results from Figure 4.

| Samples      | Shell | N               | $\Delta E_0(e)$ | R( $\text{\AA}$ ) | R-factor (%) |
|--------------|-------|-----------------|-----------------|-------------------|--------------|
| Fe-N-C/GC    | Fe-N  | 4.100 $\pm$ 0.2 | -2.095          | 2.010 $\pm$ 0.02  |              |
| Fe-FA-C/GC   | Fe-N  | 3.729 $\pm$ 0.2 | -3.5534         | 1.999 $\pm$ 0.02  | <0.01        |
| Fe-Urea-C/GC | Fe-N  | 4.73 $\pm$ 0.1  | 0.48            | 2.010 $\pm$ 0.02  |              |

**Note:** N: coordinated number; R: Bond distance;  $\Delta E_0$ , inner potential correction; All the R factors for the fitted results are within 0.02, indicating the goodness of the fitting.



**Table S6.** Comparison the ORR performances of Fe–N–C/GC with the reported nonprecious based SAS catalysts tested in 0.1 M KOH media.

| Catalysts                  | $E_{1/2}$ (V vs. RHE) | References                                   |
|----------------------------|-----------------------|----------------------------------------------|
| <b>Fe–N–C/GC</b>           | <b>0.86</b>           | <b>This work</b>                             |
| FeHis-700                  | 0.85                  | Small, 2016, 12, 5414-5421                   |
| Fe@C-NG/NCNTs              | 0.84                  | J. Mater. Chem. A, 2018, 6, 516-526.         |
| Fe <sub>3</sub> C/Fe@G-800 | 0.80                  | ACS Sustain. Chem. Eng., 2018, 6, 4890-4898. |
| SA-Fe-HPC                  | 0.85                  | Angew. Chem., Int. Ed., 2018, 57, 9038-9043. |
| Fe <sub>3</sub> -NG        | 0.86                  | Adv. Funct. Mater., 2016, 26, 5708-5717.     |
| SA-Fe-NHPC                 | 0.85                  | Adv. Mater. 2020, 32, 1907399                |
| FeN <sub>x</sub> -PNC      | 0.84                  | ACS Nano, 2018, 12, 1949-1958                |
| NCAG/Fe–Fe                 | 0.85                  | Angew. Chem., Int. Ed. 2022, 61, e202201007  |
| GO-Fe–N                    | 0.82                  | ACS Catal. 2022, 12, 1601–1613               |

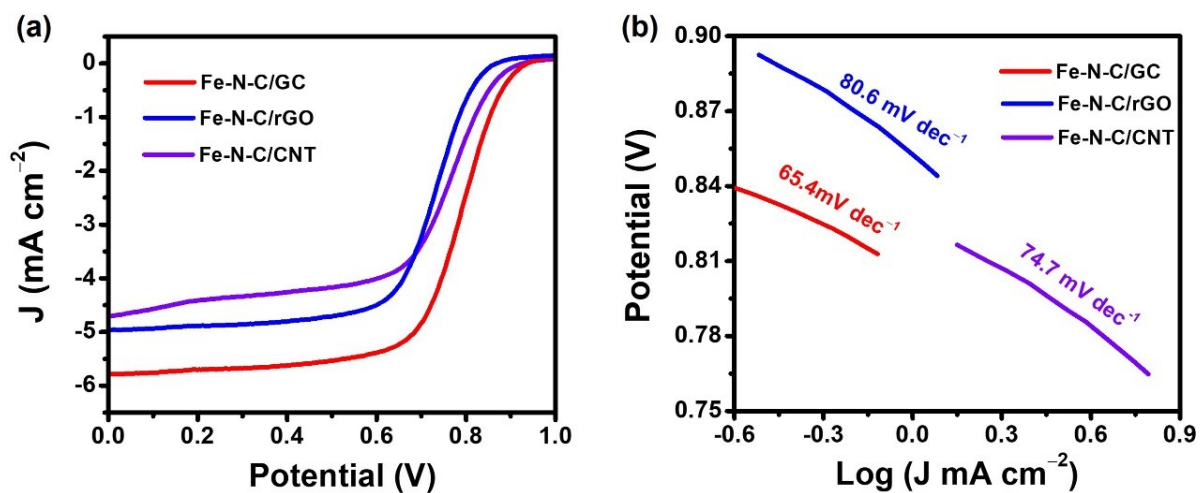

**Fig. S6** (a) LSV curves and (b) the corresponding Tafel curves of Fe–N–C/CNT, Fe–N–C/rGO, Fe–N–C/GC tested in O<sub>2</sub>–saturated 0.1 M KOH electrolyte with a scanning rate of 5 mVs<sup>-1</sup> at 1600 rpm.

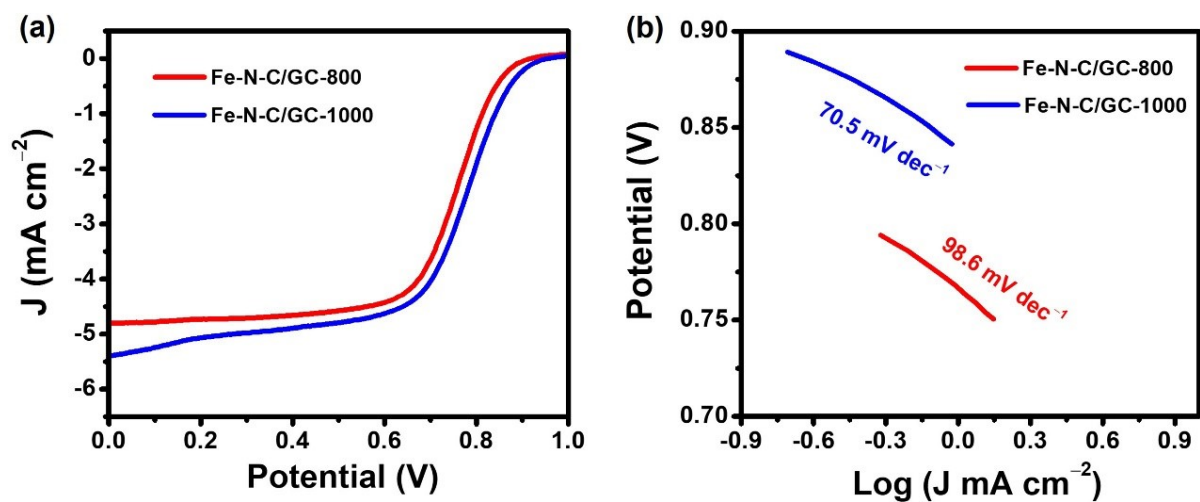

**Fig. S7** (a) LSV curves and (b) the corresponding Tafel curves of Fe-N-C/GC-800 and Fe-N-C/GC-1000 tested in  $\text{O}_2$ -saturated 0.1 M KOH electrolyte with a scanning rate of  $5 \text{ mV s}^{-1}$  at 1600 rpm.

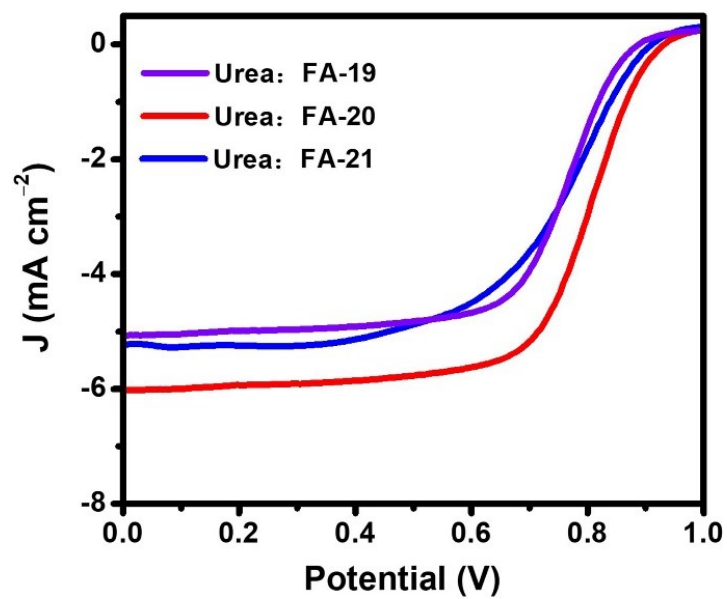

**Fig. S8** (a) LSV curves of Urea:FA-19, Urea:FA-20 and Urea:FA-21 tested in O<sub>2</sub>-saturated 0.1 M KOH electrolyte with a scanning rate of 5 mV s<sup>-1</sup> at 1600 rpm.

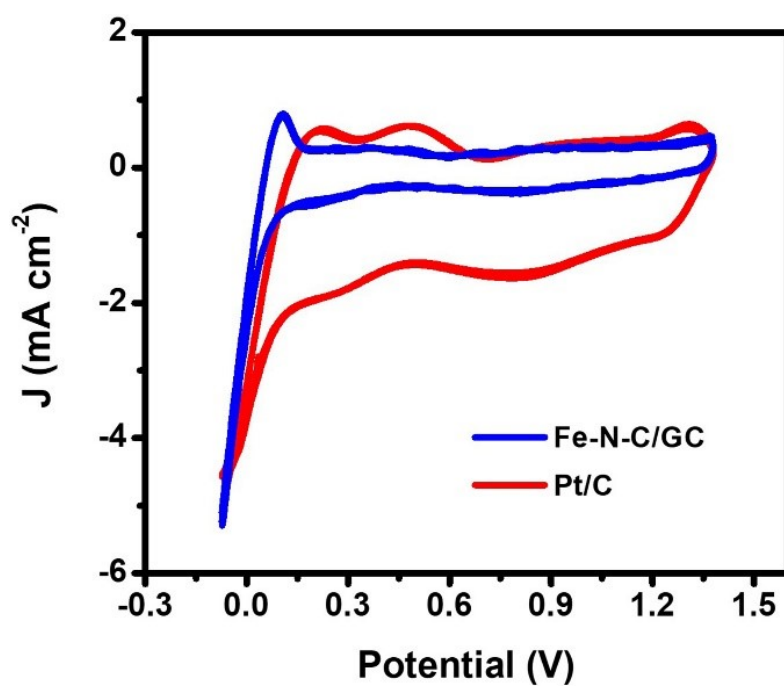

**Fig. S9** (a) CV curves of Fe-N-C/GC and Pt/C tested in O<sub>2</sub>-saturated 0.1 M KOH electrolyte at a scanning rate of 5 mV s<sup>-1</sup>.

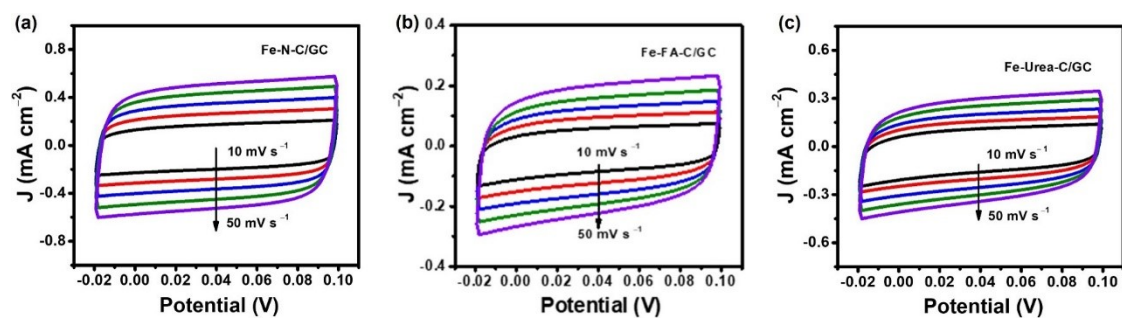

**Fig. S10** CV curves of (a) Fe-N-C/GC, (b) Fe-FA-C/GC and (c) Fe-Urea-C/GC tested in O<sub>2</sub>-saturated 0.1 M KOH electrolyte at the scan rates of 5, 10, 15, 20 and 25 mV s<sup>-1</sup>.

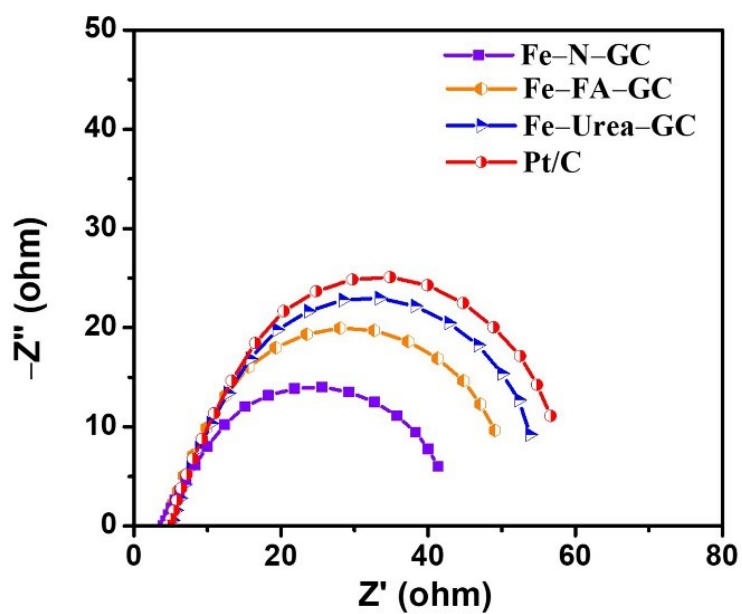

**Fig. S11** EIS Nyquist plots for Fe-N-C/GC, Fe-FA-C/GC, Fe-Urea-C/GC and Pt/C.

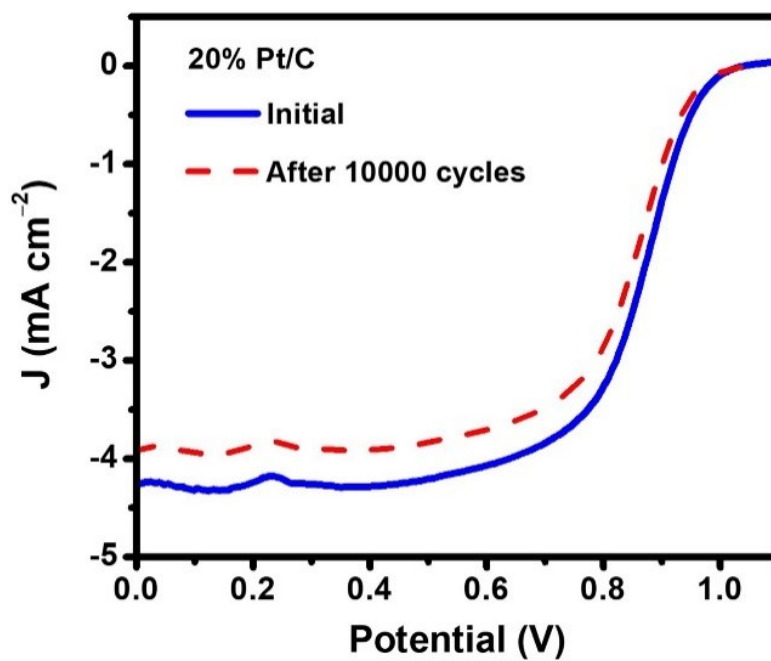

**Fig. S12** LSV curves of Pt/C at 1600 rpm with a scan rate of 5 mV s<sup>-1</sup> before and after 10000 cycles.

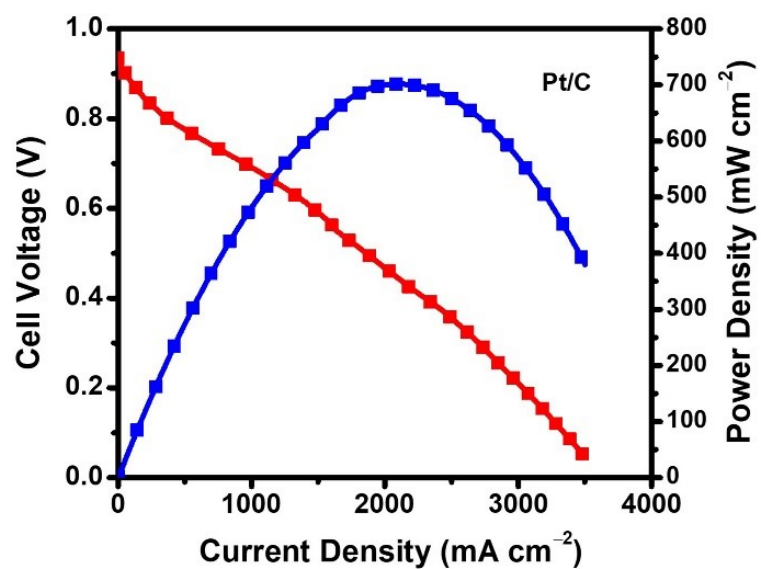

**Fig. S13** AEMFC performance of Pt/C under 1.0 bar  $\text{H}_2/\text{O}_2$  at 100 % relative humidity and 60 °C.



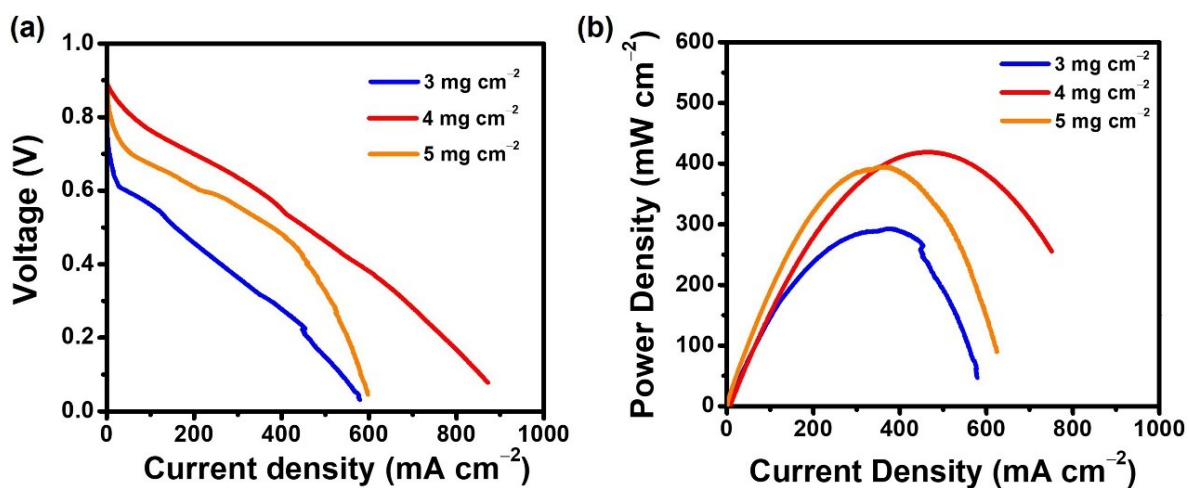

**Fig. S14** (a, b) AEMFCs performances assembled with different loadings of Fe-N-C/GC under 1.0 bar H<sub>2</sub>/O<sub>2</sub> at 100 % relative humidity and 60 °C.

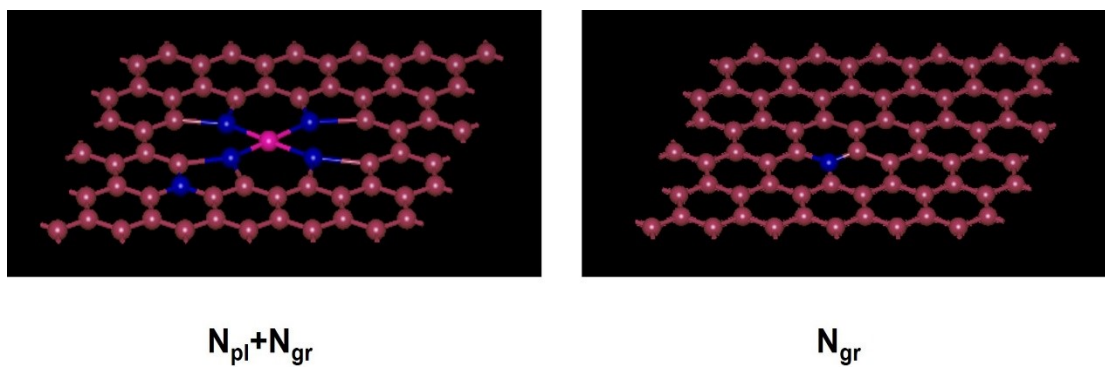

**Fig. S15** Optimal DFT calculation models of  $N_{pl}+N_{gr}$  and  $N_{gr}$ . Pink, blue, red represent Fe, N, C atoms, respectively.

**Table S7.** The calculated free energy of  $N_{pd}$ ,  $N_{pl}$ ,  $N_{pd}+N_{gr}$ ,  $N_{pl}+N_{gr}$  and  $N_{gr}$  intermediates.

| Free energy (eV) | Clean surface | OH*        | O*         | OOH*       |
|------------------|---------------|------------|------------|------------|
| $N_{pd}$         | -12046.495    | -12511.210 | -12480.913 | -12942.770 |
| $N_{pl}$         | -11728.486    | -12194.341 | -12161.344 | -12623.671 |
| $N_{pd}+N_{gr}$  | -12496.556    | -12961.571 | -12930.714 | -13393.101 |
| $N_{pl}+N_{gr}$  | -11727.561    | -12192.186 | -12160.329 | -12622.036 |
| $N_{gr}$         | -11476.704    | -11940.329 | -11911.672 | -12372.179 |

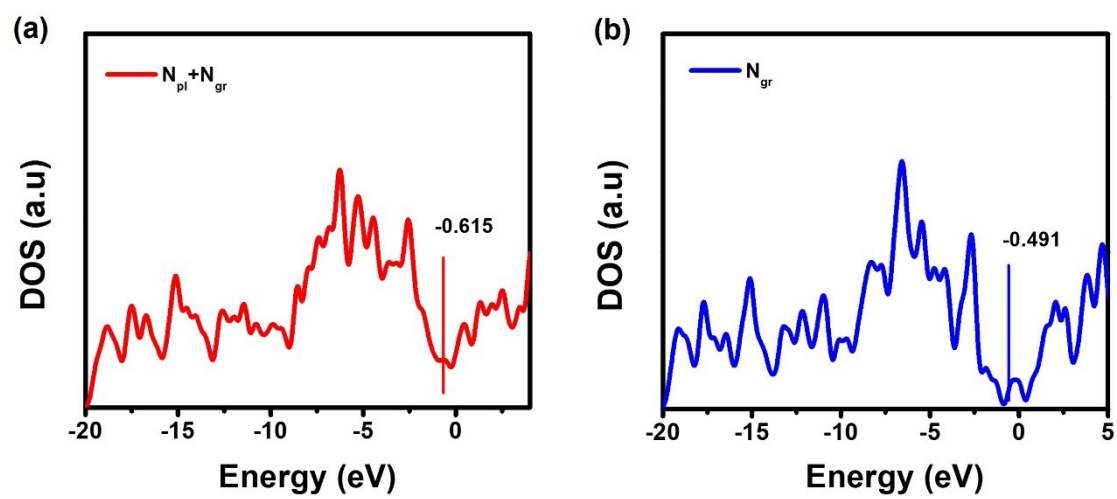

**Fig. S16** Density of states on the  $N_{pl} + N_{gr}$  and  $N_{gr}$ .

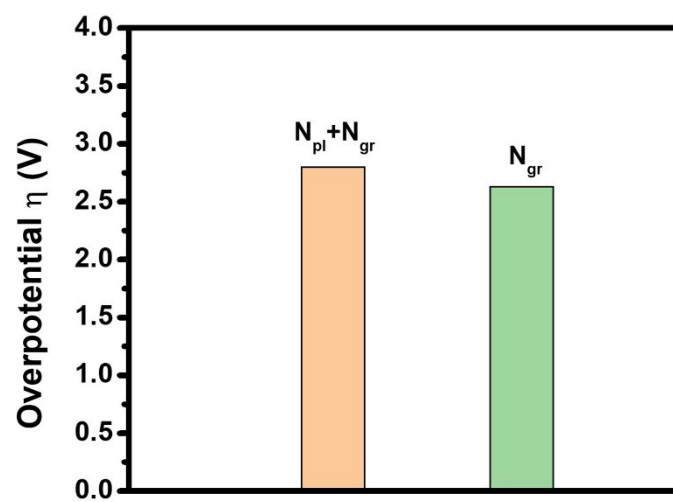

**Fig. S17** The  $\eta$  values of ORR for the  $N_{pl} + N_{gr}$  and  $N_{gr}$ .

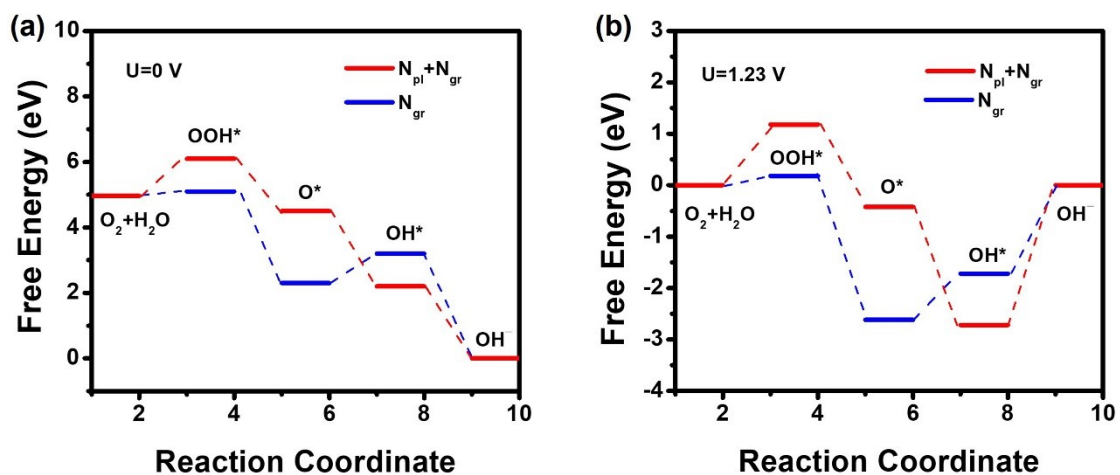

**Fig. S18** Free energy diagram for ORR process on  $N_{pl}+N_{gr}$  and  $N_{gr}$  models at the equilibrium potentials of  $U=0$  V and  $U=1.23$  V.
